# Supplementary material for: Geospatial Statistics Elucidate Competing Geological Controls on Natural CO2 Seeps in Italy
Source: Hindawi journal article supplement (doi:10.1155/2019/8147345), 2019-05-20
Supplement: f1 [file 8147345.f1.doc]

# Structural Controls on the Spatial Distribution of Natural CO2 Seeps in Italy: Supplementary Information

### Supplementary Methods

**Geological data**

The geospatial information system, ArcGIS, with an azimuth plugin (Jenness, 2005) was populated with geological information (geology, gravity data) made available by ISPRA (ISPRA, 2010), mapped fault scarps (Roberts, 2008) and seismically capable faults (ISPRA, 2007), stress field data (Barba et al., 2009), SRTM 90 m elevation data (Jarvis, 2008), seismic data (CSI 1.1 Catalogo della Sismicità Italiana 1981-2002, filtered for events from Mt Etna to remove intense clustering bias), depth to Moho data (Di Stefano, 2011), and subsurface carbonate structure (Nicolai and Gambini, 2007).

The ArcGIS project was used to qualitatively and inform our observations and interpretation, and to semi-quantitatively analyse spatial trends. Quantitative assessment using in-built tools such as proximity analyses was only performed on the 1:1M and 1:100k scale geological maps (ISPRA, 2010) and fault scarps of Roberts (2008).

**Seep data**

Seep data were elicited from Googas (Chiodini et al., 2008), a web-based catalogue of degassing sites in Italy produced in the framework of a national project, INGV-DPCV5, funded by Dipartimento della Protezione Civile and Istituto Nazionale di Geofisica e Vulcanologia (INGV), communication with Googas collaborators, fieldwork and published scientific literature (Chiodini et al., 2011; Duchi et al., 1995; Minissale, 2004). We verify Googas’ qualitative seep classifications with previously published catalogues (Bonini, 2009b; Heinicke et al., 2006; Minissale, 2004). Further, Googas data has been superseded by the Mapping Gas (MaGa) database, a web-based database for carbon degassing, MaGa (Cardellini et al., 2013).

In total, in the Googas dataset there are 270 seep locations (323 seeps total at 286 locations; of which 308 at 270 locations are dominantly composed of CO2, 15 of CH4 and 1 of N2). There are more seeps than seep locations because there are occurrences where more than one seep type is identified at one seep location (‘multisystem’ seeps). Seep data may therefore be ‘separated’ whereby each seep type has a location assigned (308 data points), or multisystem hereby each location has seep types assigned (270 data points).

Seeps classified as ‘wells’ are man-made and therefore are not considered to represent natural CO2 leakage pathways but rather indicate the presence of subsurface CO2 reservoirs. Fumaroles are high temperature volcanic emissions which are also not considered to represent natural CO2 leakage pathways. Thus, the CO2 seep dataset relevant to leaks from CO2 stores includes 264 seeps at 228 locations.

It is noted that some dry gas emissions are man-made, for example at Cava dei Selci and Solftara at Colli Albani where removal of impermeable deposits due to quarrying and mining respectively have enabled gas to escape (Carapezza and Tarchini, 2007) but the location of the majority of seeps has not been determined by human activity.

In the Googas database, each record was assigned information (including seep type, flux, historical safety, gas composition, site description, published research) although many documented seeps lack precise information other than location, type and safety.

For the purpose of our analyses, flux and seep type are considered permanent since seeps in Italy do not exhibit geyser style eruptions although there is some evidence of seep water content variation with seasonality (Heinicke et al., 2006) and flux variations with seismicity (Bonini, 2009a; Heinicke et al., 2006; Heinicke et al., 2010). Seep locations are also considered permanent since archeological discoveries at Mefite D’Ansanto indicate this seep has been active since Roman times (Chiodini et al., 2010). Edifices in the Tiber Valley have been observed to migrate several meters seasonally (Heinicke et al., 2006) however this is below the accuracy of the GIS dataset.

**Spatial statistics**

A variety of spatial statistic methods are available to quantify geographic patterns.

- We analyzed fault azimuths for geological faults in mainland Italy from the 1:1M and 1:100k scale geological maps (ISPRA, 2010), and fault scarps in the Apennines (Roberts, 2008) that indicate recent tectonism (Cowie et al., 2017).
- We conducted near analyses in GIS to extract information about the distance of the seeps to significant lithological boundaries and faults, and the position of seeps with respect to these features.
- Point clustering was first examined using cluster analysis (Clark, 1954) and Ripley K Function (RKF) in GIS. We tested both ‘separated’ and dual-system (where more than one seep type is expressed at one location) point locations.
- The two-point spatial correlation function analyzed clustering more sophisticatedly. The correlation function is a technique developed for cosmology (Peebles, 1980) and previously used in earth science to investigate earthquake aftershock distributions (Richards-Dinger et al., 2010). Correlation analyses was performed for CO2 seeps, non-volcanic seismic events and spring points and compared to a synthetic random dataset (where nrand = nseeps for consistency – i.e. the number of random points is equal to the number of seep points).
- We investigated the effect of point extent and rock type on the spatial distributions of points - to test if the two-scale distribution and alignment observed for CO₂ seeps was an artefact of outcropping lithology or increased seep density in the Tyrrhenian. The synthetic data were clipped to the seep extent (with point densities similar to the seeps) and analyses performed on points that lay within the three major seep-hosting lithologies.

### Supplementary Results

**Fault azimuth analysis**

We analyzed fault azimuths for geological faults in mainland Italy from the 1:1M and 1:100k scale geological maps (ISPRA, 2010), and fault scarps in the Apennines (Roberts, 2008) that indicate recent tectonism (Cowie et al., 2017). See SI Figure 1.


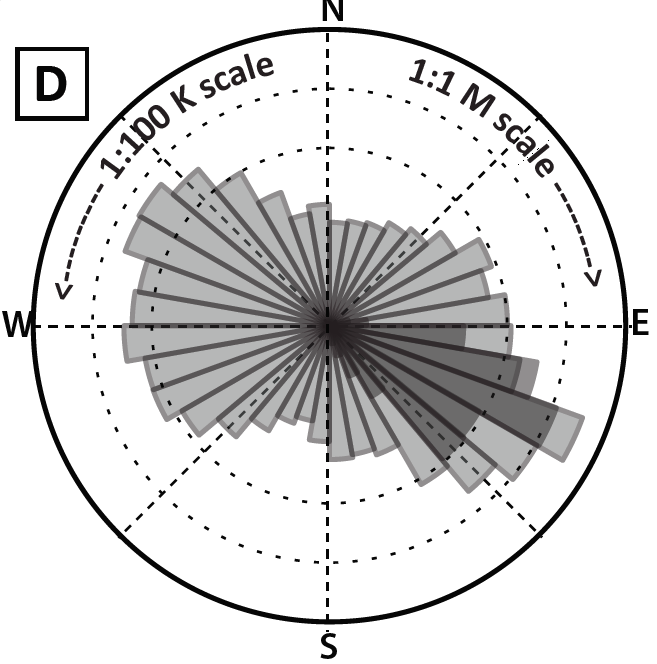


**SI Figure 1**: Polar plot of normalized azimuths from the analyzed fault datasets (normal fault scarps of Roberts (2008) in dark grey), faults from 100k and 1M scale geological maps in light grey (ISPRA, 2007).

**Cluster analysis**

The average nearest neighbor technique compares the average distance between point features with the average distance expected if these points were randomly distributed. We find that seeps are significantly clustered to 99.9% confidence. Isolated seep types are also significantly clustered, except springs which together with travertine show a near random distribution (see SI Table 1).

[SI Table 1]

| Data | Z | CI | Signif. | Distribution |
| --- | --- | --- | --- | --- |
| Seeps (sep) | -23.58 | 0.31 | 99.9% | Clustered |
| Seeps (multi) | -23.23 | 0.34 | 99.9% | Clustered |
| Spring | 1.15 | 1.65 | 75% | Dispersed |
| Bubbling Water | -11.63 | 0.42 | 99.9% | Clustered |
| Diffuse | -6.98 | 0.53 | 99.9% | Clustered |
| Vent | -7.3 | 0.5 | 99.9% | Clustered |
| Fumarole | -3.5 | 0.49 | 99.9% | Clustered |
| Seismic events | -22.32 | 0.38 | 99.9% | Clustered |
| Travertines | -0.9 | 0.95 | <65% | Random |

**SI Table 1**: Results of Point Cluster Analysis. Z-scores and Cluster Index of point data in Italy. ‘Seeps (sep)’ refers to the dataset in which multisystem seeps are separated (so that each identified seep type has a location assigned), and ‘Seeps (dual)’ refers to the dataset in which multisystem seeps are left together (and so each seep location has one or more assigned seep types). The cluster index (CI) value signifies if the points are clustered (CI<1) or dispersed (CI>1). The Z-score indicates the standard deviation (σ) from the mean. Critical Z-score values for 95% and 99% confidence intervals are ±1.96 and ±2.58 respectively. The area considered for these calculations influences the results. We set the area of computation to the area which obtains a random distribution for a random scenario (320 points randomly distributed throughout Italy).

**Ripley K-Function**

Radial distances considered for the Ripley K-Function (RKF) computations were considered at 0.5 km intervals from 0.5 - 50 km radius. The synthetic data informed the ‘expected’ random gradient given the area of Italy. K-values inform whether the distribution is more clustered (K (obs)>K (exp)) or more dispersed (K (obs)<K (exp)) than a random distribution at that scale. Results show that seeps form clusters ~5 km wide approximately ~15-20 km apart (SI Fig 2). Seeps are no longer clustered at separation distances greater 40 km.


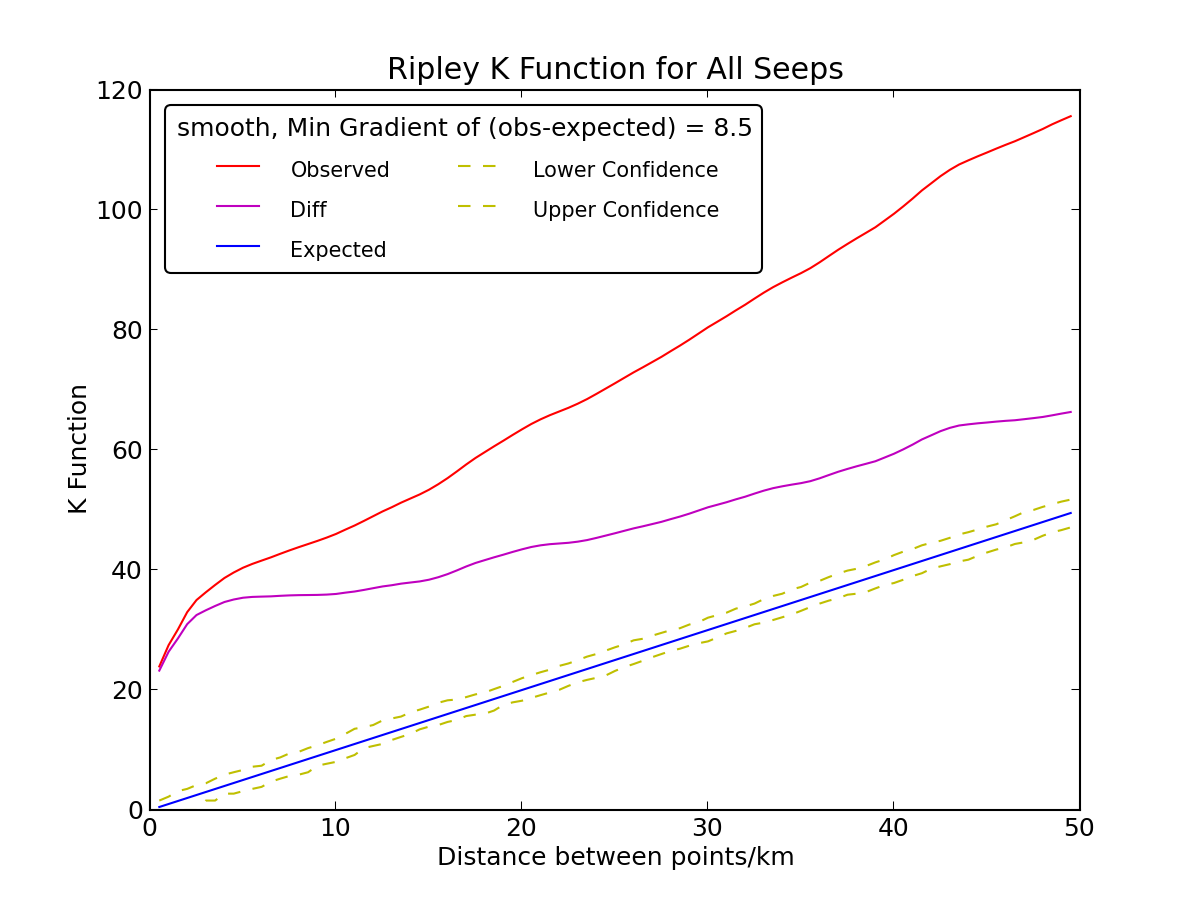


**SI Figure 2**: Ripley K Function for seeps and the synthetic random dataset. The seeps are not clustered when the K function slope approaches that of the synthetic data. A change in slope in the observed Ripley K function can be observed at ~5 km and a second minor change is observed at ~15-20 km point separation.

**Two-point correlation**

The synthetic data exhibited random point distributions, no clustering and no distance dependent point distributions, even when clipped to the most prominent seep hosting lithologies (turbidites, andesites and basalts, platform carbonates), see SI Fig 3. Thus the two-scale point correlation we observe for CO2 seeps is not an artifact of the shape or extent of outcropping lithology.

**
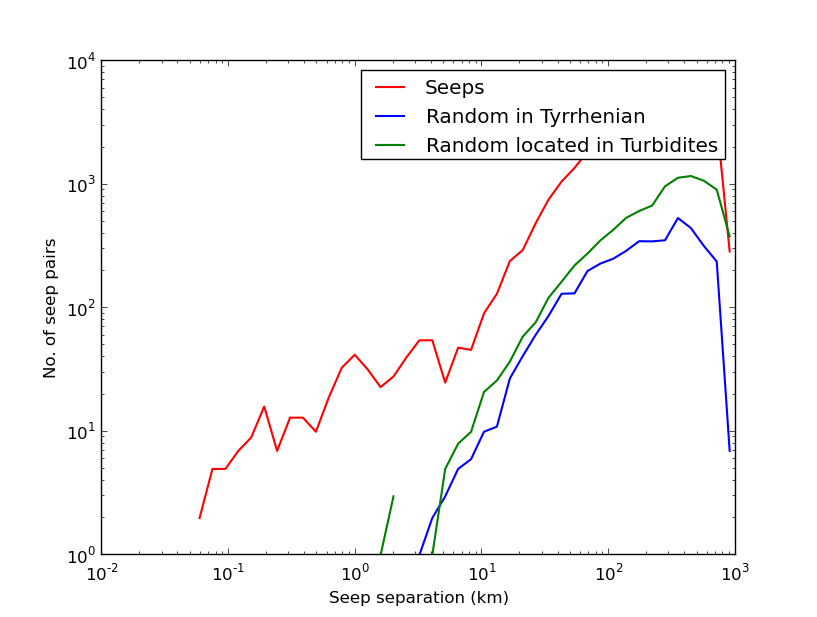
**

**SI Figure 3**: Two-point correlation results for seep data compared with results of synthetic points located in the Tyrrhenian sector (where seeps are most numerous) and seeps hosted in turbiditic rock units (the most common outcropping rock type in central Italy). Seep data shows two-scale distribution, whereas synthetic points do not. Point azimuth analyses finds no spatial trend below 10 km point separation.

## References
